# Supplementary material
Source: ML conference proceedings conference paper supplement (https://openreview.net/forum?id=AwhpBEqmyo)
Supplement: supplementary_material [file attachment]

668 **A Author Statement**

669 We bear all responsibilities for the content, licensing, distribution, and maintenance of our datasets  
670 in STORYBENCH. Our datasets are released under a CC-BY-4.0 license, and our code under an  
671 Apache license. Data, code and annotation guidelines are hosted on GitHub at the following URL:  
672 <https://github.com/google/storybench>.

673 **B Ethics Statement**

674 The aim of STORYBENCH is to enable reliable measurements of progress in generative text-to-video  
675 models. While this kind of models have great potential to assist and augment human creativity [60],  
676 there are broader societal issues that need to be considered when developing these models.

677 First, while we annotate an evaluation set, training current, strong text-to-video models is computa-  
678 tionally expensive. This affects not only their financial cost (*e.g.*, hardware and electricity), but also  
679 their environmental cost due to the carbon footprint of modern tensor processing hardware [61].

680 Second, massive amounts of data are required to train state-of-the-art generative models. Such datasets  
681 are harvested from the Web, which tend to reflect social stereotypes, oppressive viewpoints, and  
682 harmful associations to marginalized identity groups [62-64]. Other biases include those introduced  
683 by the use of examples that primarily have English texts and may reflect North American and  
684 Western European cultures [65]. We expect models trained on them to reflect these biases, and hence  
685 caution developers to assess the limitations of their models before integrating them into user-facing  
686 applications. To facilitate positive and safe integration of text-to-video models, we encourage future  
687 work to create benchmark evaluations to assess social and cultural biases of these technologies.

688 While multimodal models can unlock creative applications that can benefit humanity, they can also  
689 enable harmful applications. These include surveillance, especially when people are recorded and the  
690 recordings are used without their consent, or generation of harmful content, such as pornographic  
691 material. A particularly sensitive topic in this space is disinformation. When model outputs achieve  
692 realistic quality, they can be used to create convincing fake content (*i.e.*, deepfakes). These can be  
693 exploited to spread fake news, defame individuals or portray false situations. To mitigate these harms,  
694 watermarks can be applied to every generated video [66] such that it is possible to identify whether  
695 any given video is generated by a particular model.

696 Due to the impacts and limitations described above, we remark that STORYBENCH aims to measure  
697 progress in text-to-video research. For the same reasons, we do not release our baselines to the public.  
698 By no means should our data be extended for use in sensitive domains, but rather for creative goals.  
699 We believe that generative technologies like the type of text-to-video models that can be evaluated in  
700 STORYBENCH can become useful tools to enhance human productivity and creativity.

701 The collection of our datasets has been enabled by the careful work of several participants. Due to  
702 privacy concerns, we did not include the estimated hourly wage paid to them or the total amount  
703 spent on participant compensation. We feel that individuals' hourly wage or compensation is personal  
704 information and we cannot disclose this under privacy law. However, this work was carried out by  
705 paid contractors, and we can confirm that they received their standard contracted wage, which is  
706 above the living wage in their country of employment.

707 **C Datasheet**

708 **Motivation**

709 **Q1 For what purpose was the dataset created? Was there a specific task in mind? Was there a**  
710 **specific gap that needed to be filled? Please provide a description.**

711 STORYBENCH was created to encourage reproducible progress in text-to-video modeling. Existing  
712 video captioning datasets consist of a single sentence describing the salient events that happen  
713 throughout the entire video. Existing dense video captioning datasets, instead, are either domain-  
714 specific (*e.g.*, instructional video) or contain captions that lack enough information to generate a  
715 video. With our annotation protocol, we describe each action separately and also map it to a precise  
716 timestamp interval, allowing us to evaluate the ability of text-to-video models to generate arbitrarily  
717 long stories. Our task of continuous story visualization is closely related to the existing one of story

718 visualization, which was, however, limited to generate a single key-frame per caption, rather than a  
719 continuous video. With the release of STORYBENCH, we aim to establish a framework for reliable  
720 evaluation of forthcoming generative video technologies.

721 **Q2 Who created the dataset (e.g., which team, research group) and on behalf of which entity**  
722 **(e.g., company, institution, organization)?**

723 STORYBENCH was collected by Google Research.

724 **Q3 Who funded the creation of the dataset?** If there is an associated grant, please provide the  
725 name of the grantor and the grant name and number.

726 Google Research funded the creation of STORYBENCH.

727 **Q4 Any other comments?**

728 No.

## 729 **Composition**

730 **Q5 What do the instances that comprise the dataset represent (e.g., documents, photos, people,**  
731 **countries)?** *Are there multiple types of instances (e.g., movies, users, and ratings; people and*  
732 *interactions between them; nodes and edges)? Please provide a description.*

733 We provide 8,900 annotations of stories across six splits. Each story contains an object se-  
734 rialized in JSON with the following fields: `sentence_parts`, `start_times`, `end_times`,  
735 `original_combined_sentence`, `clip_start_time`, `clip_end_time`, `story_number`,  
736 `background_description`, `dataset_name`, `video_name`, `vidln_id`, `question_info`,  
737 `num_actors_in_video`, `segment_categories`. We provide a description of each field in the  
738 README file of our code online. In addition to our annotations, an instance of the dataset requires  
739 the corresponding video file from existing datasets.

740 **Q6 How many instances are there in total (of each type, if appropriate)?**

741 The DiDeMo-CSV dev split has 744/744 videos/stories, and the test split has 655/655 videos/stories.

742 The Oops-CSV dev split has 979/1578 videos/stories, and the test split has 979/1578 videos/stories.

743 The UVO-CSV dev split has 1019/1665 videos/stories, and the test split has 1565/2613 videos/stories.

744 **Q7 Does the dataset contain all possible instances or is it a sample (not necessarily random)**  
745 **of instances from a larger set?** *If the dataset is a sample, then what is the larger set? Is the*  
746 *sample representative of the larger set (e.g., geographic coverage)? If so, please describe how*  
747 *this representativeness was validated/verified. If it is not representative of the larger set, please*  
748 *describe why not (e.g., to cover a more diverse range of instances, because instances were withheld*  
749 *or unavailable).*

750 STORYBENCH consists of annotations from a subset of dev and test videos from DiDeMo, Oops, and  
751 UVO. The annotated videos were selected based on a few criteria: (i) public availability as of February  
752 22, 2023; (ii) lack of inappropriate content; (iii) annotation quality insurance; (iv) preprocessing  
753 criteria (e.g., by removing videos whose first action last less than 1.5s).

754 **Q8 What data does each instance consist of?** *“Raw” data (e.g., unprocessed text or images) or*  
755 *features? In either case, please provide a description.*

756 We provide raw annotations and corresponding video filenames (text). In addition, we also release  
757 the features used to compute our set of automatic metrics for the ground-truth videos.

758 **Q9 Is there a label or target associated with each instance?** *If so, please provide a description.*

759 The goal of the dataset is not to classify any given instance. However, we enrich the annotation  
760 of each action to easily analyze failure modes by collecting 35 labels across 6 categories (camera  
761 movements, foreground entities, foreground actions, background actions, foreground interactions,  
762 foreground transitions). We provide the full list of labels in the main body of the paper.

763 **Q10 Is any information missing from individual instances?** *If so, please provide a description,*  
764 *explaining why this information is missing (e.g., because it was unavailable). This does not include*  
765 *intentionally removed information, but might include, e.g., redacted text.*

766 No.

767 **Q11 Are relationships between individual instances made explicit (e.g., users’ movie ratings,**  
768 **social network links)?** *If so, please describe how these relationships are made explicit.*

769 No.

770 **Q12 Are there recommended data splits (e.g., training, development/validation, testing)?** *If so,*  
771 *please provide a description of these splits, explaining the rationale behind them.*

772 Yes. We collect annotations for the existing dev and test splits. We thus recommend using the original  
773 training/dev/test splits to avoid any leakage.

774 **Q13 Are there any errors, sources of noise, or redundancies in the dataset?** *If so, please provide*  
775 *a description.*

776 Some videos have multiple stories, which correspond to different instances in our datasets. For data  
777 collected in VidLN [20], these correspond to descriptions centered around different actors.

778 **Q14 Is the dataset self-contained, or does it link to or otherwise rely on external resources**  
779 **(e.g., websites, tweets, other datasets)?** *If it links to or relies on external resources, a) are there*  
780 *guarantees that they will exist, and remain constant, over time; b) are there official archival versions*  
781 *of the complete dataset (i.e., including the external resources as they existed at the time the dataset*  
782 *was created); c) are there any restrictions (e.g., licenses, fees) associated with any of the external*  
783 *resources that might apply to a future user? Please provide descriptions of all external resources and*  
784 *any restrictions associated with them, as well as links or other access points, as appropriate.*

785 Our benchmark and the datasets we collected rely on existing video datasets (DiDeMo, Oops, and  
786 UVO). We do not provide archival versions of the complete datasets, but the corresponding video  
787 resources are publicly available for download from their official websites.

788 **Q15 Does the dataset contain data that might be considered confidential (e.g., data that is**  
789 **protected by legal privilege or by doctor–patient confidentiality, data that includes the content**  
790 **of individuals’ non-public communications)?** *If so, please provide a description.*

791 No.

792 **Q16 Does the dataset contain data that, if viewed directly, might be offensive, insulting, threat-**  
793 **ening, or might otherwise cause anxiety?** *If so, please describe why.*

794 Our collected annotations have been verified by humans not to contain inappropriate content. More-  
795 over, our annotators flagged videos that contained sensitive data, which were then all discarded.  
796 While we did make an attempt to remove inappropriate content, we cannot exclude that a small  
797 number of inappropriate samples might have gone unnoticed.

798 **Q17 Does the dataset relate to people?** *If not, you may skip the remaining questions in this section.*

799 Several of our descriptions and corresponding videos are about people. All of the datasets have been  
800 verified for sensitive content, and several instances do not include people.

801 **Q18 Does the dataset identify any subpopulations (e.g., by age, gender)?**

802 We do not explicitly collect annotations for any subpopulation. However, it may still be possible to  
803 deduce this information from the videos and/or the written descriptions.

804 **Q19 Is it possible to identify individuals (i.e., one or more natural persons), either directly or**  
805 **indirectly (i.e., in combination with other data) from the dataset?** *If so, please describe how.*

806 Yes, it may be possible to identify people from the videos corresponding to our annotations.

807 **Q20 Does the dataset contain data that might be considered sensitive in any way (e.g., data**  
808 **that reveals racial or ethnic origins, sexual orientations, religious beliefs, political opinions or**  
809 **union memberships, or locations; financial or health data; biometric or genetic data; forms**  
810 **of government identification, such as social security numbers; criminal history)?** *If so, please*  
811 *provide a description.*

812 Yes, our data might be considered sensitive. For instance, the associated videos reveal racial or ethnic  
813 origins of people shown in them. However, we note that we removed any videos that were found  
814 inappropriate by our annotators.

815 **Q21 Any other comments?**

816 We call for responsible usage of our datasets for research purposes *only* given the potential of  
817 text-guided video generation technologies to affect users.

## 818 **Collection Process**

819 **Q22 How was the data associated with each instance acquired?** *Was the data directly observ-*  
820 *able (e.g., raw text, movie ratings), reported by subjects (e.g., survey responses), or indirectly*

821 *inferred/derived from other data (e.g., part-of-speech tags, model-based guesses for age or lan-*  
822 *guage)? If data was reported by subjects or indirectly inferred/derived from other data, was the data*  
823 *validated/verified? If so, please describe how.*

824 We collected human annotations from existing, publicly available video datasets. During the collection  
825 campaign, our annotators directly looked at the raw videos. A random sample of the annotations  
826 were verified by other humans to ensure high-quality standards.

827 **Q23 What mechanisms or procedures were used to collect the data (e.g., hardware apparatus**  
828 **or sensor, manual human curation, software program, software API)? How were these mecha-**  
829 **nisms or procedures validated?**

830 We collected human annotations through web user interfaces that we developed. They were validated  
831 by manual inspection by us and managers from the company we hired to collect human annotations.

832 **Q24 If the dataset is a sample from a larger set, what was the sampling strategy (e.g., deter-**  
833 **ministic, probabilistic with specific sampling probabilities)?**

834 We annotated all the videos from the evaluation sets of existing datasets that were still available  
835 online at the time of our data collection. We also discarded any videos that were found inappropriate.

836 **Q25 Who was involved in the data collection process (e.g., students, crowdworkers, contrac-**  
837 **tors) and how were they compensated (e.g., how much were crowdworkers paid)?**

838 We hired a third-party company to collect human annotations from contractors, who received their  
839 standard contracted wage, which is above the living wage in their country of employment. The first  
840 and last author were also closely involved during the data collection to ensure that the instructions  
841 were clear and resolve any doubts raised by the crowdworkers.

842 **Q26 Over what timeframe was the data collected? Does this timeframe match the creation**  
843 **timeframe of the data associated with the instances (e.g., recent crawl of old news articles)? If**  
844 **not, please describe the timeframe in which the data associated with the instances was created.**

845 Our video annotations were collected between December 2022 and March 2023, but the corresponding  
846 videos were previously collected by other authors.

847 **Q27 Were any ethical review processes conducted (e.g., by an institutional review board)? If**  
848 **so, please provide a description of these review processes, including the outcomes, as well as a link**  
849 **or other access point to any supporting documentation.**

850 No institutional review board conducted any ethical review process since we do not modify the  
851 original videos, and the datasets providing the videos are publicly available and have previously been  
852 published in peer-reviewed journals and conferences.

853 **Q28 Does the dataset relate to people? If not, you may skip the remaining questions in this section.**

854 Yes, people may appear in our annotations as well as in the corresponding videos.

855 **Q29 Did you collect the data from the individuals in question directly, or obtain it via third**  
856 **parties or other sources (e.g., websites)?**

857 We collected annotations from crowdworkers, not from the individuals shown in the original videos.

858 **Q30 Were the individuals in question notified about the data collection? If so, please describe**  
859 **(or show with screenshots or other information) how notice was provided, and provide a link or other**  
860 **access point to, or otherwise reproduce, the exact language of the notification itself.**

861 Individuals were not notified about our data collection, which involved describing their actions in  
862 publicly released videos.

863 **Q31 Did the individuals in question consent to the collection and use of their data? If so, please**  
864 **describe (or show with screenshots or other information) how consent was requested and provided,**  
865 **and provide a link or other access point to, or otherwise reproduce, the exact language to which the**  
866 **individuals consented.**

867 We collect annotations from existing, publicly available video datasets. We do not, however, annotate  
868 videos that were no longer available online at the time our annotation campaign was conducted, to  
869 adhere with the users' intent to remove their content online.

870 **Q32 If consent was obtained, were the consenting individuals provided with a mechanism to**  
871 **revoke their consent in the future or for certain uses? If so, please provide a description, as well**  
872 **as a link or other access point to the mechanism (if appropriate).**

873 Users can check whether any of their videos is used in our datasets from the corresponding URLs.  
874 If users wish to remove their videos after finding them sensitive, they can contact the hosting party

875 and request to delete the content from the underlying website. Users can also contact us to request  
876 removal of the instances in our datasets corresponding to their videos.

877 **Q33 Has an analysis of the potential impact of the dataset and its use on data subjects (e.g., a**  
878 **data protection impact analysis) been conducted?** *If so, please provide a description of this anal-*  
879 *ysis, including the outcomes, as well as a link or other access point to any supporting documentation.*

880 The goal of our datasets is to encourage research towards generative models that can assist and  
881 boost artists in generating novel content. However, the resulting technologies could be used to create  
882 misinformation online, such as through deepfakes. Yet, we believe that our datasets are the first  
883 of their kind to study the problem of generating videos from captions that vary over time. Hence,  
884 considering both limitations and opportunities offered by our data, we authorize the dataset for purely  
885 academic endeavors.

886 **Q34 Any other comments?**

887 No.

### 888 **Preprocessing, Cleaning, and/or Labeling**

889 **Q35 Was any preprocessing/cleaning/labeling of the data done (e.g., discretization or bucket-**  
890 **ing, tokenization, part-of-speech tagging, SIFT feature extraction, removal of instances, pro-**  
891 **cessing of missing values)?** *If so, please provide a description. If not, you may skip the remainder*  
892 *of the questions in this section.*

893 Yes, we ask human annotators to select which of 34 labels are related to any video segment and  
894 captions. We remove any instances (i) whose first action lasts less than 1.5s, or (ii) have a timestamp  
895 gap longer than 0.5s between any two consecutive actions.

896 **Q36 Was the “raw” data saved in addition to the preprocessed/cleaned/labeled data (e.g., to**  
897 **support unanticipated future uses)?** *If so, please provide a link or other access point to the “raw”*  
898 *data.*

899 No, we do not save the raw data due to data retention policies in our organization.

900 **Q37 Is the software used to preprocess/clean/label the instances available?** *If so, please provide*  
901 *a link or other access point.*

902 Yes, we release our preprocessing scripts on GitHub.

903 **Q38 Any other comments?**

904 No.

### 905 **Uses**

906 **Q39 Has the dataset been used for any tasks already?** *If so, please provide a description.*

907 Our datasets have not been used for other tasks yet. However, the underlying videos have been used  
908 for their original tasks, such as temporal localization with DiDeMo, studying unintentional human  
909 action with Oops, and dense, open-world segmentation with UVO. Moreover, VidLN annotations  
910 have been used for the tasks of video narrative grounding and video question answering.

911 **Q40 Is there a repository that links to any or all papers or systems that use the dataset?** *If so,*  
912 *please provide a link or other access point.*

913 We encourage the community to measure progress in our benchmark and datasets at the URL  
914 <https://paperswithcode.com/dataset/storybench>

915 **Q41 What (other) tasks could the dataset be used for?**

916 Our data can be used for the dual task of describing videos over time. In addition, our data could  
917 be used to develop automatic evaluation metrics that better align with human preferences. We also  
918 believe that the richness of our data will encourage future work to create new, exciting tasks.

919 **Q42 Is there anything about the composition of the dataset or the way it was collected and**  
920 **preprocessed/cleaned/labeled that might impact future uses?** *For example, is there anything that*  
921 *a future user might need to know to avoid uses that could result in unfair treatment of individuals or*  
922 *groups (e.g., stereotyping, quality of service issues) or other undesirable harms (e.g., financial harms,*  
923 *legal risks) If so, please provide a description. Is there anything a future user could do to mitigate*  
924 *these undesirable harms?*

925 Our annotations describe existing video datasets that might not contain a fair distribution of individuals  
926 or groups. For our task, this means that models might be able to generate videos that are biased

927 towards the populations represented in the training data. We encourage future work to extend our  
928 efforts towards creating training and evaluation datasets that specifically aim to increase fairness and  
929 reduce biases (e.g., correlation between gender, race and jobs) of generative text-to-video models.

930 **Q43 Are there tasks for which the dataset should not be used? If so, please provide a description.**

931 Under no circumstances should any models developed for our benchmark be used to create deepfakes  
932 or any other form of disinformation or harm, including military and surveillance tasks. As it stands,  
933 our datasets should solely be used for research purposes.

934 **Q44 Any other comments?**

935 No.

## 936 **Distribution**

937 **Q45 Will the dataset be distributed to third parties outside of the entity (e.g., company, in-**  
938 **stitution, organization) on behalf of which the dataset was created? If so, please provide a**  
939 **description.**

940 Yes, the data will be publicly released.

941 **Q46 How will the dataset be distributed (e.g., tarball on website, API, GitHub)? Does the**  
942 **dataset have a digital object identifier (DOI)?**

943 The data will be available on GitHub.

944 **Q47 When will the dataset be distributed?**

945 From September 2023 and onward.

946 **Q48 Will the dataset be distributed under a copyright or other intellectual property (IP) li-**  
947 **cence, and/or under applicable terms of use (ToU)? If so, please describe this license and/or ToU,**  
948 **and provide a link or other access point to, or otherwise reproduce, any relevant licensing terms or**  
949 **ToU, as well as any fees associated with these restrictions.**

950 CC-BY-4.0

951 **Q49 Have any third parties imposed IP-based or other restrictions on the data associated with**  
952 **the instances? If so, please describe these restrictions, and provide a link or other access point**  
953 **to, or otherwise reproduce, any relevant licensing terms, as well as any fees associated with these**  
954 **restrictions.**

955 No, our collected annotations are released under a CC-BY-4.0 license. Third-party data are also  
956 released publicly.

957 **Q50 Do any export controls or other regulatory restrictions apply to the dataset or to individ-**  
958 **ual instances? If so, please describe these restrictions, and provide a link or other access point to,**  
959 **or otherwise reproduce, any supporting documentation.**

960 No.

961 **Q51 Any other comments?**

962 No.

## 963 **Maintenance**

964 **Q52 Who will be supporting/hosting/maintaining the dataset?**

965 Google Research will support and maintain the STORYBENCH annotations on GitHub. The original  
966 videos are supported by the corresponding dataset creators or services.

967 **Q53 How can the owner/curator/manager of the dataset be contacted (e.g., email address)?**

968 We can be contacted either via email or through ‘pull requests’ on the STORYBENCH GitHub page.

969 **Q54 Is there an erratum? If so, please provide a link or other access point.**

970 There is no erratum for our first release. Errata will be documented as future releases on GitHub.

971 **Q55 Will the dataset be updated (e.g., to correct labeling errors, add new instances, delete**  
972 **instances)? If so, please describe how often, by whom, and how updates will be communicated to**  
973 **users (e.g., mailing list, GitHub)?**

974 No, we do not plan on updating the data. However, we will update the data should there be any errors  
975 or requests for deleting specific instances. The updated data will be shared as a ‘release’ on GitHub.

976 **Q56 If the dataset relates to people, are there applicable limits on the retention of the data**  
977 **associated with the instances (e.g., were individuals in question told that their data would be**  
978 **retained for a fixed period of time and then deleted)?** *If so, please describe these limits and*  
979 *explain how they will be enforced.*

980 We do not collect any metadata related to people in creating STORYBENCH. However, we note that  
981 our datasets consist of text annotations of existing video datasets. Should people request for their  
982 videos to be deleted from the original datasets, we invite them and users to contact us to ensure that  
983 the corresponding annotations are removed from STORYBENCH.

984 **Q57 Will older versions of the dataset continue to be supported/hosted/maintained?** *If so,*  
985 *please describe how. If not, please describe how its obsolescence will be communicated to users.*

986 Yes, we will distribute all versions of STORYBENCH as ‘releases’ on GitHub.

987 **Q58 If others want to extend/augment/build on/contribute to the dataset, is there a mechanism**  
988 **for them to do so?** *If so, please provide a description. Will these contributions be validated/verified?*  
989 *If so, please describe how. If not, why not? Is there a process for communicating/distributing these*  
990 *contributions to other users? If so, please provide a description.*

991 There is no plan to support and verify third-party contributions that aim at extending the datasets in  
992 STORYBENCH as our annotations correspond to standard evaluation splits of existing video datasets.  
993 However, we will update the data should there be any errors or requests for deleting specific instances.  
994 Dataset versions will be maintained as GitHub releases.

995 **Q59 Any other comments?**

996 No.

## 997 **D Data Preparation Details**

998 In this section, we provide further details on the preparation pipeline used for the evaluation (dev and  
999 test) data in STORYBENCH. It consists of the following steps: collection, preprocessing, and rating.

### 1000 **D.1 Data Collection**

1001 First, we use an online interface (see Figure 5) to collect stories for each video. Stories consist of  
1002 multiple sentences, each describing an action, and the corresponding timestamps in the video.

1003 **Oops-CSV and UVO-CSV.** For VidLN data (UVO and Oops), we provide the original VidLN  
1004 caption, as well as reference split captions provided from our automatic pipeline (*c.f.* Section 4). In  
1005 this stage, annotators were instructed to ‘split the long sentence into shorter sentences, each describing  
1006 actions that happen one after the other’ and to ‘add time stamps for when (the action of) each sentence  
1007 starts and ends.’ Moreover, our annotators are asked to click two checkboxes, whenever applicable:  
1008 ‘Multiple stories,’ used to indicate whether the video shown in the user interface actually consists of  
1009 multiple shorter clips (this is common in Oops, as the data consists of fail video *compilations*); and  
1010 ‘Unimportant actor,’ used to indicate whether the original caption describes the events in the video  
1011 from the perspective of an entity that does not play a salient role in the video (*e.g.*, a person in the  
1012 background). Finally, we perform a second stage of annotations where we provide annotators with  
1013 the stories from the first stage, and ask them to ‘continue the sentence that describes the actor’s action  
1014 in a natural manner by adding a concise context description of relevant actions of other actors.’ This  
1015 second round of annotations was required as VidLN describes the actions of a given entity (actor)  
1016 throughout a video, which does not often capture the dynamics of the corresponding video segments.  
1017 Our annotators narrate 2,446 and 2,779 videos from the dev sets of Oops and UVO, respectively.

1018 **DiDeMo-CSV.** For DiDeMo, we do not possess any descriptions of the video. Instead, the dataset  
1019 provides detailed text queries (*e.g.*, containing camera movement, temporal transition indicators, and  
1020 activities) that are used to localize events in the video. We provide those queries as a reference to our  
1021 annotators, and ask them to ‘add a description of the background,’ ‘specify the number of important  
1022 actors in the video,’ ‘refine the sentences to create a coherent story,’ and ‘add timestamps for when  
1023 (the action of) each sentence starts and ends.’ Following the original DiDeMo protocol, each video is  
1024 trimmed to a maximum of 30 seconds. While the original dev and test sets contained 1,065 and 1,004  
1025 videos, respectively, only 843 and 797 videos were still publicly available as of February 22, 2023.

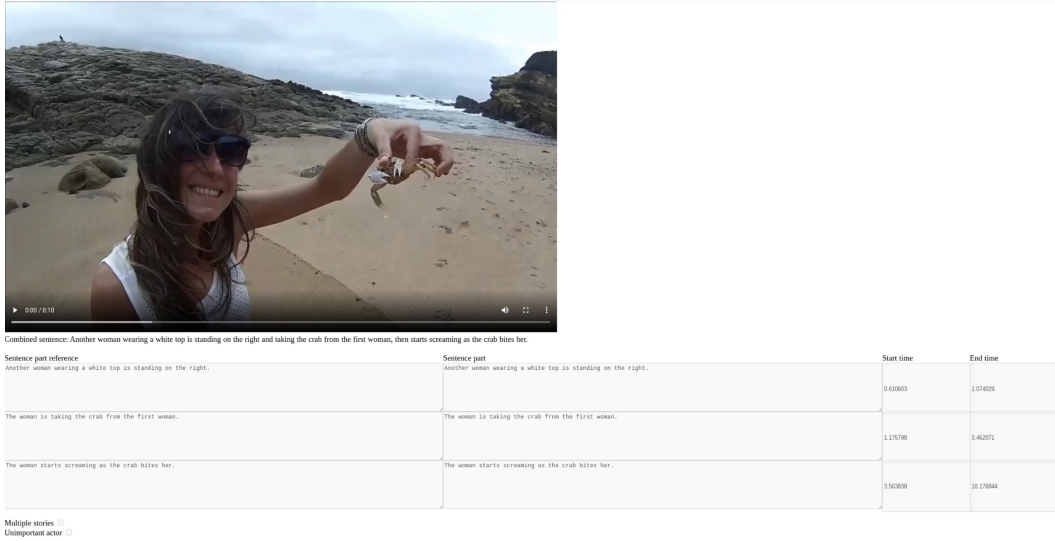

Figure 5: Example of our video annotation interface.

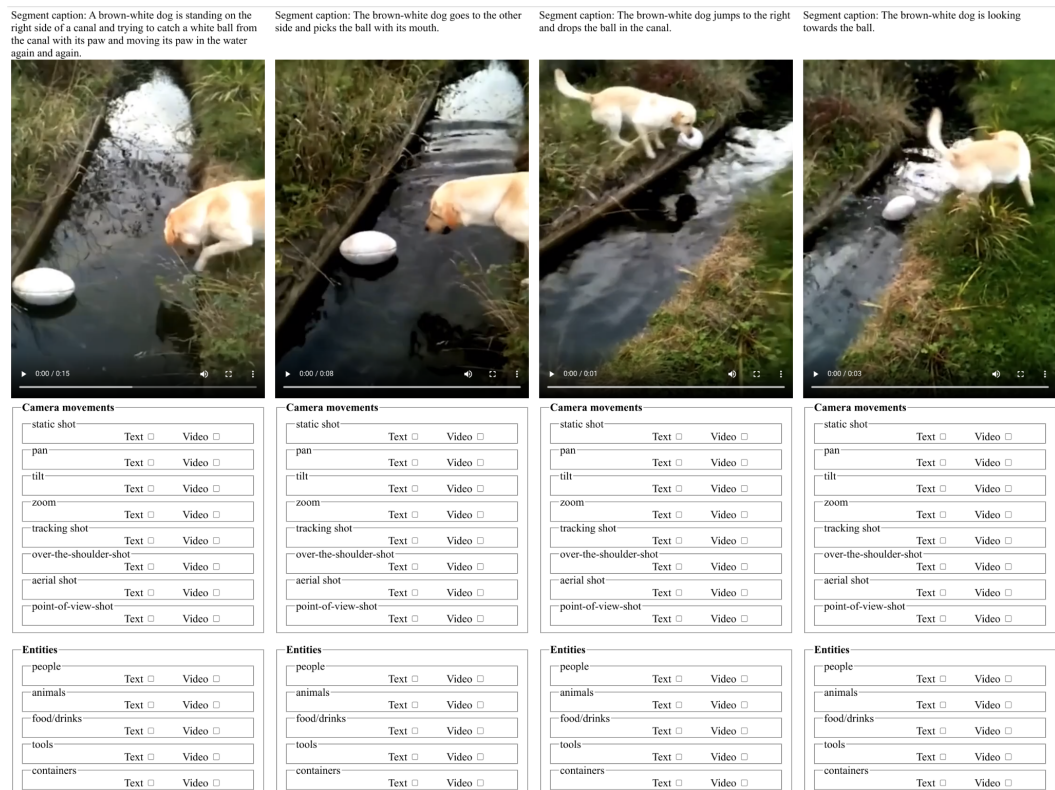

Figure 6: Example of our diagnostic labels collection interface.

1026 In both cases, we provide additional details for both of these tasks to the annotators, as well as  
 1027 examples and corner cases to clearly communicate the desired annotations (available on GitHub).  
 1028 During this collection process, any video flagged by the annotators to contain inappropriate content  
 1029 was removed. Finally, a random sample of our annotations were verified by expert annotators  
 1030 identified by the third party company responsible for human annotations in this project.



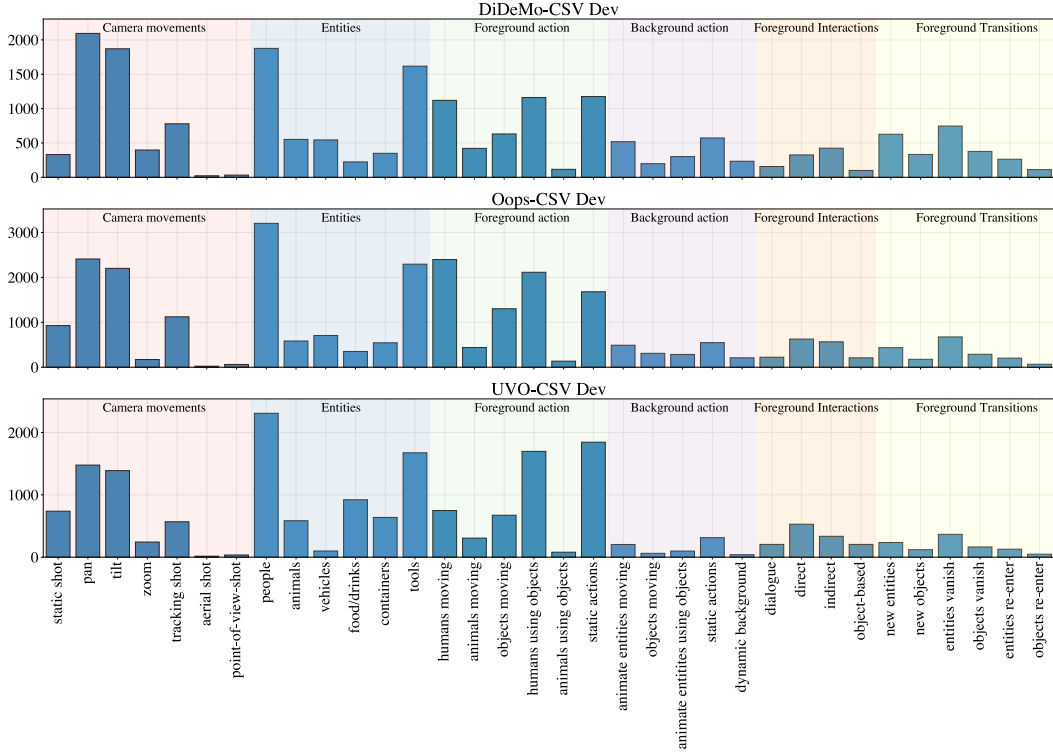

Figure 7: Distribution of collected labels per category in our dev samples.

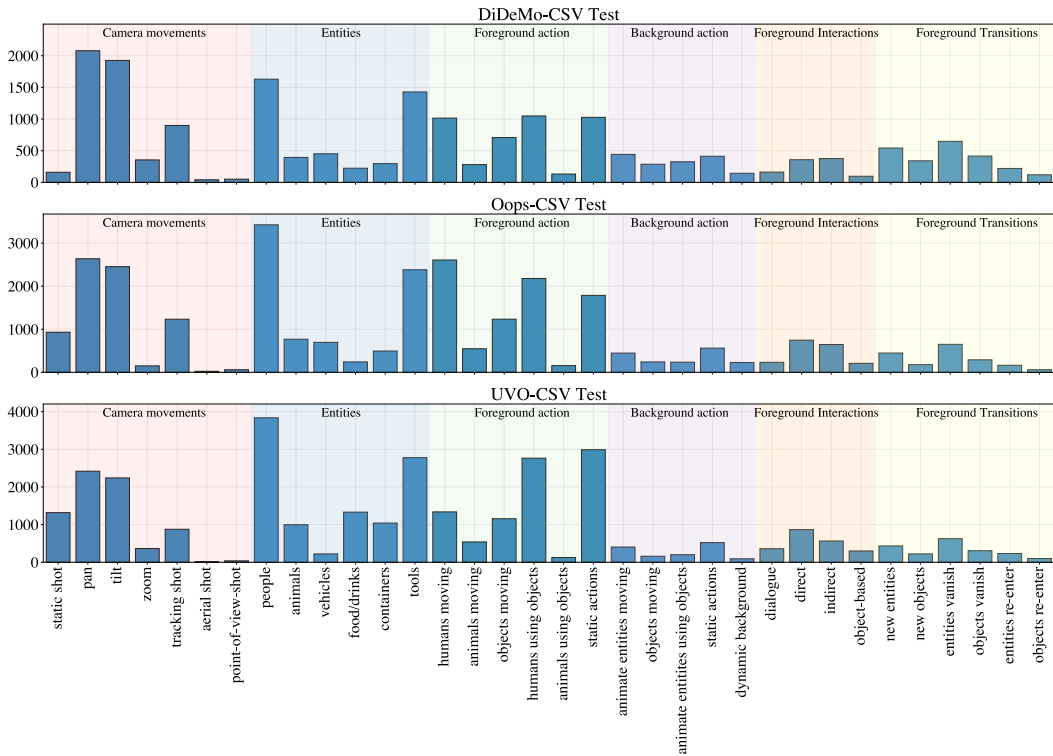

Figure 8: Distribution of collected labels per category in our test samples.

1031 **Diagnostic labels.** After collecting story annotations for our videos, we enrich them with labels to  
1032 help analyze the performance of forthcoming text-to-video models along different axes. With the help  
1033 of artists that have been using generative AI technologies, we define 34 labels across six categories  
1034 (*c.f.* Section 3). For each video segment, we then ask our annotators to tick two checkboxes per label:  
1035 ‘Text’ if the label is mentioned in the segment caption; and ‘Video’ if the label is shown in the video.  
1036 Figure 6 shows an example of the UI used in this process, and we release our full set of instructions  
1037 online. Figures 7 and 8 show the distribution of labels in our preprocessed (*i.e.*, final) data.

1038 **Human annotation framework.** We assess the high quality of our annotations as follows. First,  
1039 annotators were only moved to the final data annotation process after having successfully completed  
1040 a training stage. Second, we asked annotators’ managers to verify the quality (*i.e.*, descriptions and  
1041 timestamps match the content of the videos) of the final data by manually checking 25% of the data  
1042 samples. Here, they found 97% of the samples to accurately reflect the narratives of the videos.

## 1043 D.2 Data Preprocessing

1044 Given the above collected annotations, we perform the following two preprocessing steps. First,  
1045 we only keep stories whose first action is at least 1.5s long; as we use a video of 0.5s to condition  
1046 text-to-video generation for the task of *story continuation*. Second, we remove any story in which  
1047 two subsequent actions have more than 0.5s gap.

1048 Figures 9 and 10 shows our final data distributions. For DiDeMo-CSV, the dev split has 744/744  
1049 videos/stories, while the test split has 655/655 videos/stories. For Oops-CSV, the dev split has  
1050 979/1578 videos/stories, while the test split has 979/1578 videos/stories. For UVO-CSV, the dev split  
1051 has 1019/1665 videos/stories, while the test split has 1565/2613 videos/stories.

1052 The preprocessed data is then adapted for each of our evaluation tasks detailed in Section 3: *action*  
1053 *execution*, *story continuation*, and *story generation*. Finally, to evaluate our baselines, the original  
1054 videos are downsampled to 8 frames per second (fps) using the ‘FFmpeg’ open-source software.

1055 Figures 12 to 14 show examples of the resulting data.

## 1056 D.3 Human Evaluation

1057 Human evaluation is the preferred way to assess the capabilities of generative models. We perform  
1058 side-by-side comparisons between two models, and ask human raters to choose the one (if any) that  
1059 performs better according to the five criteria that we defined in Section 3. Figure 15 shows an example  
1060 of the user interface developed for human evaluation.

## 1061 D.4 Automatic Evaluation

1062 Section 3.4 introduces our automatic evaluation metrics. Here, we provide our intuition of how  
1063 we expect them to relate to our human evaluation metrics. **FID** would measure “visual quality”  
1064 since it compares the distribution of ground-truth frames with that of generated frames. **FVD** would  
1065 measure “entity consistency” and “action realism” since it compares the distribution of ground-truth  
1066 videos with that of generated videos. **SIM** would measure “visual quality”, “entity consistency”,  
1067 “background consistency”, and “text adherence” as it compares ground-truth and generated frames  
1068 one-to-one. **VTM** would measure “text adherence” as it compares generated videos to their prompts.  
1069 **PQA** would measure “visual quality” and “action realism” as it was trained to predict the average  
1070 human subjective perception of a video.

## 1071 D.5 Robustness of Automatic Pipeline

1072 In Section 4, we define an automatic pipeline to transform the original VidLN captions for Oops  
1073 and UVO into multiple sentences, each approximately describing a single action, and to estimate  
1074 their corresponding timestamps. Here, we compute some statistics to assess the quality of the  
1075 stories generated automatically through our algorithmic pipeline by comparing them against human  
1076 references for the Oops Dev set (1,578 stories).

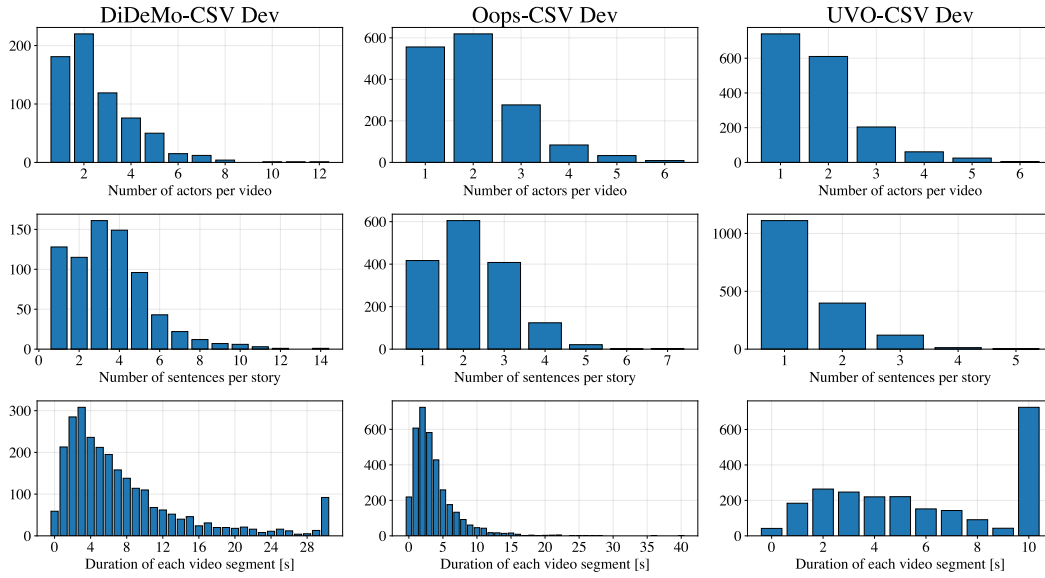

Figure 9: Statistics of our final dev sets.

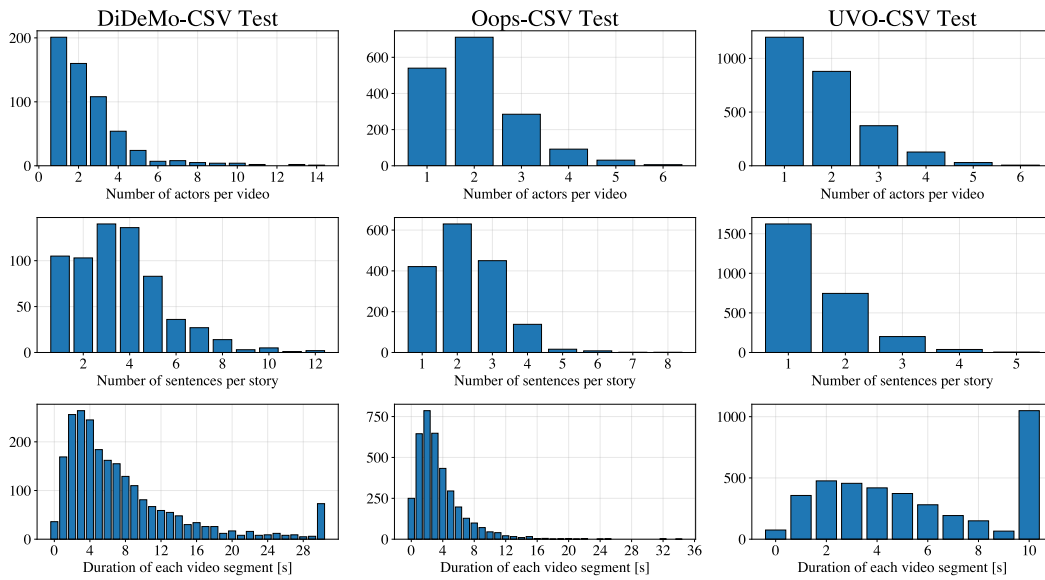

Figure 10: Statistics of our final test sets.

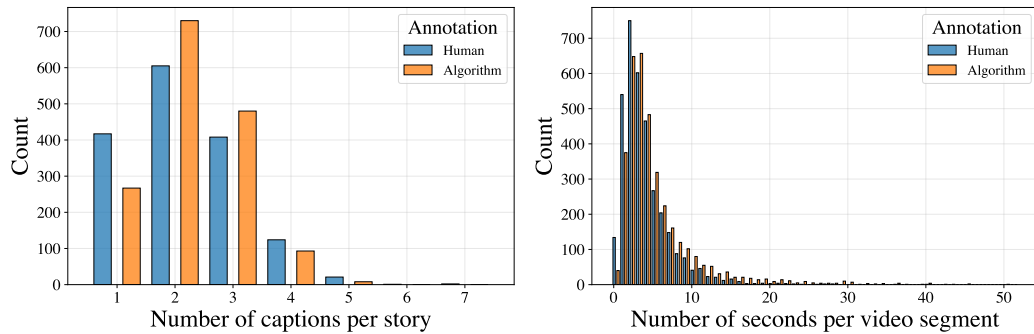

Figure 11: Robustness statistics of automated pipeline for story-like data transformation. Left: Number of captions per story. Right: Duration of video segments in seconds.

PROMPT: A man wearing white shorts is jumping on a trampoline.

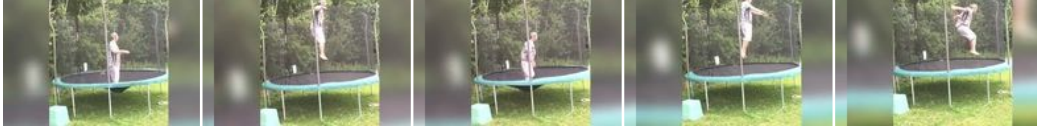

PROMPT: The man performing a flip.

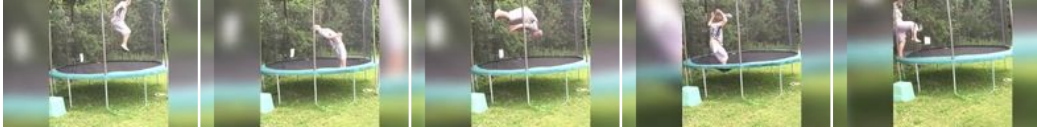

PROMPT: The man falls when the trampoline falls on the ground.

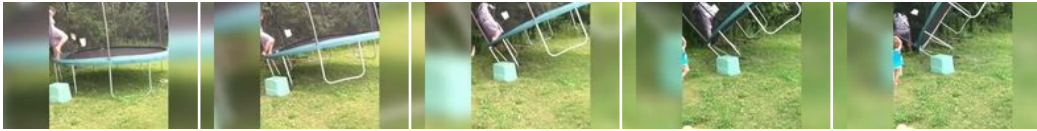

Figure 12: Example story (subsamped frames) from Oops-CSV.

PROMPT: A baby wearing blue clothes first touches the girl's ice cream while the first girl is eating her ice cream.

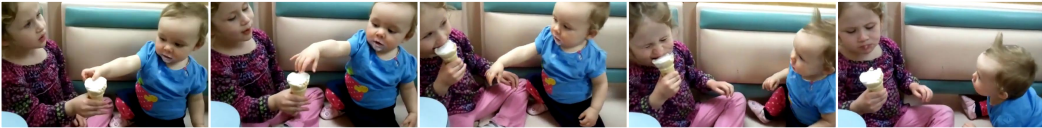

PROMPT: The baby turns back.

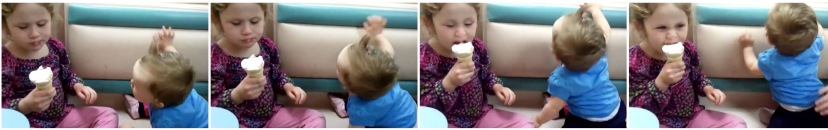

PROMPT: The baby starts climbing on the back side of the seat.

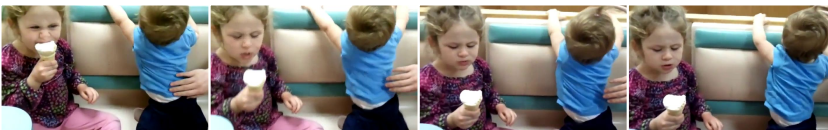

Figure 13: Example story (subsamped frames) from UVO-CSV.

1077 As shown in Figure [11](#) (left), the distributions of the number of sentences per story of the two  
1078 approaches are very similar. In particular, we notice that our method tends to split captions into two  
1079 or three segments more often than the human annotators, who, more often, prefer not to split them.

1080 The words corresponding to each video segment are very similar between human and automatic  
1081 stories. To assess this, we consider the subset of captions that have been split into the same number  
1082 of sentences, so we can compute one-to-one mappings between the human and the algorithmic  
1083 captions. Here, we observe a BLEU<sub>4</sub> score of 63.6% (BLEU<sub>4</sub> measures the overlap of 4-grams in  
1084 the two captions), indicating a relatively high similarity of generated sentences to human references.  
1085 We also note that humans were asked to enrich the original Oops and UVO captions with context  
1086 information (*e.g.*, what other relevant actors are doing while a specific actor is being narrated), which  
1087 our algorithmic pipeline does not explicitly tackle, leaving room for improvement in future work.

1088 Finally, Figure [11](#) (right) shows that the resulting duration of the algorithmically generated video  
1089 segments are slightly longer than human-annotated timestamps.

PROMPT: A white-brown dog is sitting and starts moving towards the person.

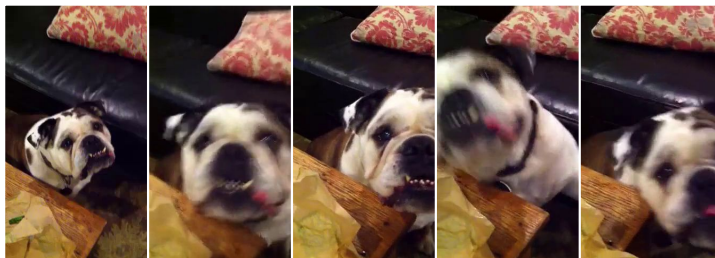

PROMPT: A person whose only hand and leg is visible is holding some food in his hand.

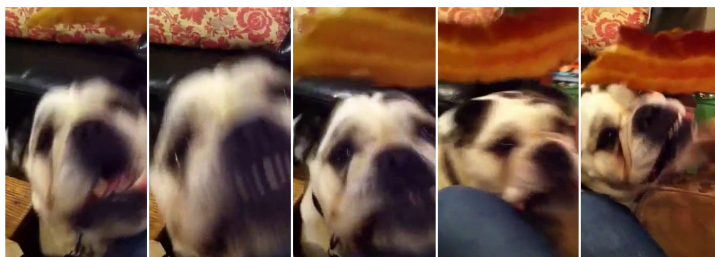

PROMPT: The white-brown dog is take food from the person hand and eats, while the camera focus on the dog face.

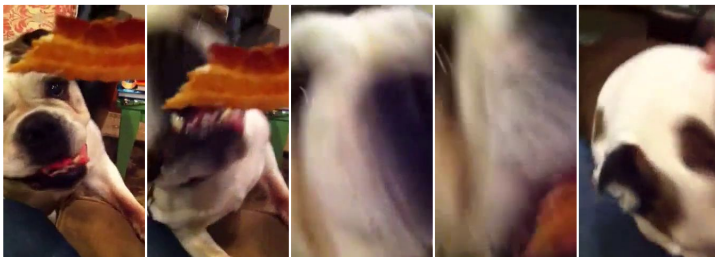

PROMPT: The person starts rubbing the dog head with his hand.

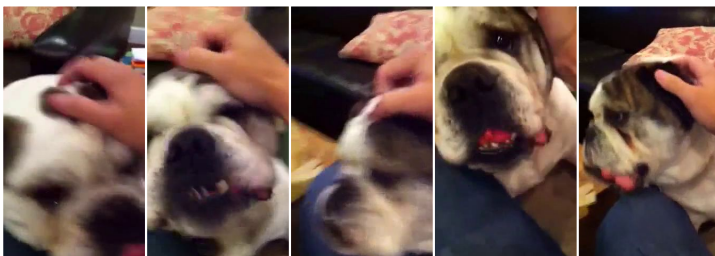

Figure 14: Example story (subsamped frames) from DiDeMo-CSV.

## 1090 E Additional Results

1091 In this section, we report our full set of results from our baselines on STORYBENCH, in terms of both  
1092 human evaluations and through automatic metrics. Recall that we append -ZS for results obtained in  
1093 the *zero-shot* setting, -ST for *single-task* fine-tuning, and -MT for *multi-task* fine-tuning. Each model  
1094 was fine-tuned for 500K steps in less than a day on 4x4x4 TPUv4 chips. For every story, each model  
1095 generates 4 output videos at 8fps using a 160x96 pixel resolution. We randomly sample one of them  
1096 for human evaluation (e.g., Figure 16), but report mean and standard deviation for automatic metrics.

### 1097 E.1 Human Evaluation

1098 Figure 17 shows the results of human evaluation, where each bar displays the number of wins of two  
1099 given models evaluated side-by-side, as well as the number of ties (in white). For each story, we ask  
1100 three human raters to compare two models and report the majority vote in Figure 17.

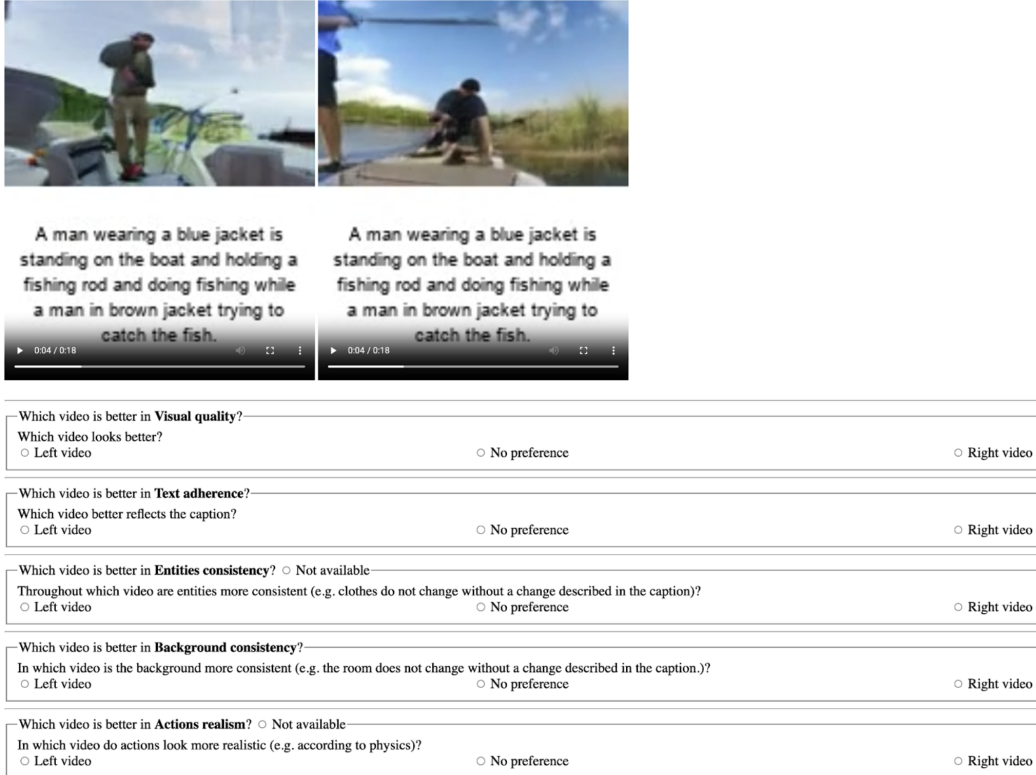

Figure 15: Example of our human rating interface.

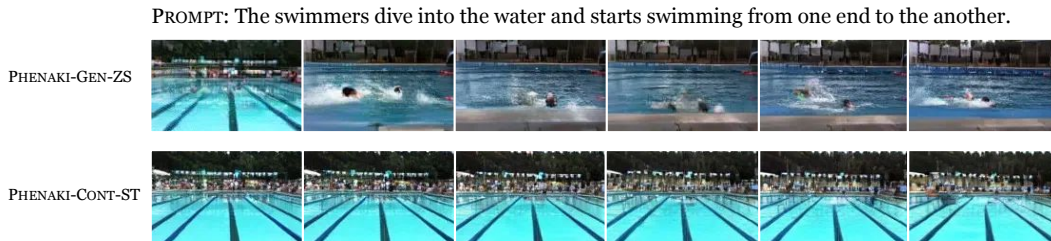

Figure 16: Example of generated actions by PHENAKI-GEN-ST and PHENAKI-CONT-ST on DiDeMo-CSV. PHENAKI-GEN-ST quickly changes the background, while PHENAKI-CONT-ST correctly synthesizes a person swimming left-to-right without distorting the background. Video subsampled by a factor 4 to be shown here.

1101 Looking at task of *action execution* on Oops-CSV, we see that our PHENAKI-CONT-ST achieves  
 1102 competitive performance with our PHENAKI-GEN-ZS baseline, with better text adherence, back-  
 1103 ground consistency and action realism. This result is not surprising as most of the actions in Oops are  
 1104 short (less than 5s). It is interesting, however, to see that our annotators find PHENAKI-CONT-ST  
 1105 largely better than PHENAKI-GEN-ST across all criteria. On the other hand, none of these models  
 1106 clearly outperforms others for the most challenging task of *story generation*.

1107 For the task of *story continuation*, PHENAKI-CONT-ST typically outperforms both PHENAKI-GEN-  
 1108 ZS and PHENAKI-GEN-ST, especially on Oops-CSV. On UVO-CSV and DiDeMo-CSV, PHENAKI-  
 1109 CONT-ST consistently outperforms PHENAKI-GEN-ST except for entity and background consistency,  
 1110 where human raters often have no preference between the two. Comparing multi-task models, we  
 1111 find that PHENAKI-CONT-MT is always preferred to PHENAKI-GEN-MT; yet PHENAKI-GEN-ZS is  
 1112 a strong baseline, achieving better visual quality than the fine-tuned models.

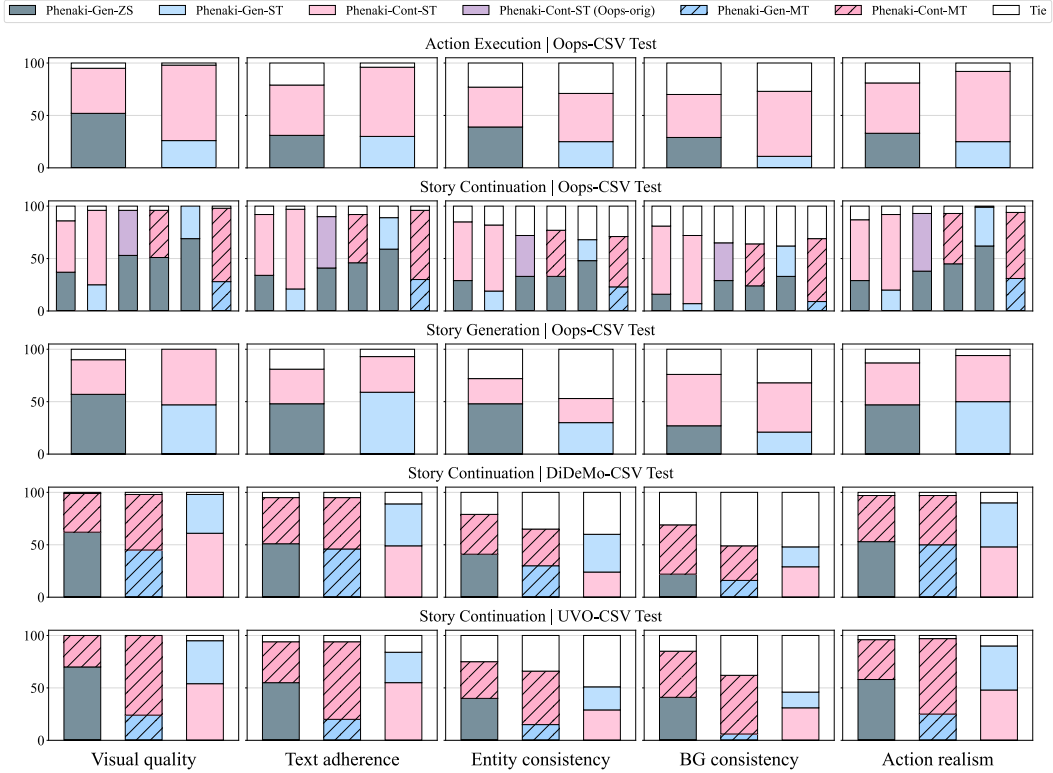

Figure 17: Results from human evaluation across datasets and tasks.

1113 **E.2 Automatic Evaluation**

1114 For completeness, Tables 8 to 10 report the performance of our baselines on all tasks and datasets  
 1115 when instead using CLIP to compute FID and SIM, and InternVideo to compute FVD and VTM. We  
 1116 find similar patterns as with other metrics (*c.f.* Section 6), but also notice that InternVideo (used for  
 1117 FVD and VTM) favors the videos generated by the zero-shot PHENAKI-GEN model.

| Action Execution Model (@8 fps) | Oops-CSV           |                     |                    |                  |                     | UVO-CSV            |                     |                    |                  |                     | DiDeMo-CSV         |                     |                    |                  |                     |
|---------------------------------|--------------------|---------------------|--------------------|------------------|---------------------|--------------------|---------------------|--------------------|------------------|---------------------|--------------------|---------------------|--------------------|------------------|---------------------|
|                                 | FID <sub>C</sub> ↓ | FVD <sub>IV</sub> ↓ | SIM <sub>C</sub> ↑ | PQA↑             | VTM <sub>IV</sub> ↑ | FID <sub>C</sub> ↓ | FVD <sub>IV</sub> ↓ | SIM <sub>C</sub> ↑ | PQA↑             | VTM <sub>IV</sub> ↑ | FID <sub>C</sub> ↓ | FVD <sub>IV</sub> ↓ | SIM <sub>C</sub> ↑ | PQA↑             | VTM <sub>IV</sub> ↑ |
| PHENAKI-GEN-ZS                  | 94.7±0.52          | <b>126.7</b> ±0.46  | 64.9±0.08          | <b>5.8</b> ±0.03 | <b>22.6</b> ±0.07   | 79.2±0.38          | <b>85.3</b> ±0.41   | 66.7±0.03          | <b>8.5</b> ±0.10 | <b>23.0</b> ±0.03   | 97.2±0.34          | <b>78.0</b> ±0.25   | 64.3±0.08          | <b>6.7</b> ±0.02 | <b>22.9</b> ±0.05   |
| <i>Zero-shot</i>                |                    |                     |                    |                  |                     |                    |                     |                    |                  |                     |                    |                     |                    |                  |                     |
| <i>Single-Task</i>              |                    |                     |                    |                  |                     |                    |                     |                    |                  |                     |                    |                     |                    |                  |                     |
| PHENAKI-GEN-ST                  | 97.1±0.20          | 179.4±0.28          | 64.8±0.04          | 4.0±0.02         | 20.0±0.02           | 97.3±0.18          | 147.6±0.20          | 62.5±0.04          | 4.8±0.05         | 18.4±0.02           | 89.3±0.22          | 120.2±0.59          | 64.9±0.04          | 4.5±0.02         | 20.4±0.03           |
| PHENAKI-CONT-ST                 | <b>84.5</b> ±0.02  | 171.6±0.58          | <b>67.9</b> ±0.04  | 4.8±0.02         | 19.9±0.01           | 92.4±0.27          | 143.2±0.31          | 64.0±0.09          | 5.6±0.02         | 18.7±0.03           | <b>82.5</b> ±0.22  | 107.3±0.46          | <b>66.8</b> ±0.01  | 5.6±0.01         | 20.1±0.01           |
| <i>Multi-Task</i>               |                    |                     |                    |                  |                     |                    |                     |                    |                  |                     |                    |                     |                    |                  |                     |
| PHENAKI-GEN-MT                  | 102.8±0.64         | 179.3±0.63          | 63.7±0.04          | 3.8±0.04         | 20.1±0.04           | 92.1±0.68          | 138.9±0.42          | 63.3±0.03          | 5.1±0.05         | 19.2±0.02           | 88.2±0.44          | 119.6±0.47          | 64.3±0.04          | 4.7±0.06         | 20.1±0.02           |
| PHENAKI-CONT-MT                 | 86.0±0.52          | 171.3±0.56          | 67.4±0.11          | 4.7±0.01         | 20.1±0.03           | <b>77.9</b> ±0.08  | 126.8±0.24          | <b>67.1</b> ±0.06  | 6.8±0.01         | 19.9±0.02           | 85.4±0.14          | 106.5±0.29          | 66.4±0.07          | 5.8±0.03         | 19.9±0.03           |

Table 8: Results from automatic evaluation metrics on *action execution* tasks. Best results are in **bold**. FID and SIM use CLIP, FVD and VTM use InternVideo, and PQA uses DOVER.

| Story Continuation Model (@8 fps) | Oops-CSV           |                     |                    |                  |                     | UVO-CSV            |                     |                    |                  |                     | DiDeMo-CSV         |                     |                    |                  |                     |
|-----------------------------------|--------------------|---------------------|--------------------|------------------|---------------------|--------------------|---------------------|--------------------|------------------|---------------------|--------------------|---------------------|--------------------|------------------|---------------------|
|                                   | FID <sub>C</sub> ↓ | FVD <sub>IV</sub> ↓ | SIM <sub>C</sub> ↑ | PQA↑             | VTM <sub>IV</sub> ↑ | FID <sub>C</sub> ↓ | FVD <sub>IV</sub> ↓ | SIM <sub>C</sub> ↑ | PQA↑             | VTM <sub>IV</sub> ↑ | FID <sub>C</sub> ↓ | FVD <sub>IV</sub> ↓ | SIM <sub>C</sub> ↑ | PQA↑             | VTM <sub>IV</sub> ↑ |
| PHENAKI-GEN-ZS                    | 103.2±0.87         | <b>116.6</b> ±0.54  | 63.1±0.05          | <b>7.2</b> ±0.06 | <b>22.5</b> ±0.05   | 82.2±0.51          | <b>83.6</b> ±0.44   | 65.9±0.04          | <b>9.4</b> ±0.09 | <b>22.9</b> ±0.03   | 108.2±0.43         | <b>87.9</b> ±0.41   | 61.7±0.04          | <b>7.3</b> ±0.07 | <b>22.5</b> ±0.10   |
| <i>Zero-shot</i>                  |                    |                     |                    |                  |                     |                    |                     |                    |                  |                     |                    |                     |                    |                  |                     |
| <i>Single-Task</i>                |                    |                     |                    |                  |                     |                    |                     |                    |                  |                     |                    |                     |                    |                  |                     |
| PHENAKI-GEN-ST                    | 99.6±0.07          | 181.5±0.74          | 64.0±0.05          | 4.3±0.02         | 19.7±0.02           | 97.8±0.26          | 151.1±0.21          | 62.5±0.03          | 5.0±0.03         | 18.2±0.01           | 90.9±0.18          | 127.5±0.48          | 64.2±0.03          | 4.0±0.02         | 19.9±0.02           |
| PHENAKI-CONT-ST                   | <b>89.2</b> ±0.30  | 169.9±0.67          | <b>66.3</b> ±0.05  | 5.3±0.04         | 19.5±0.02           | 94.1±0.29          | 147.3±0.75          | 63.5±0.07          | 5.7±0.03         | 18.3±0.02           | <b>89.4</b> ±0.29  | 118.1±0.60          | <b>64.5</b> ±0.05  | 5.4±0.03         | 19.4±0.06           |
| <i>Multi-Task</i>                 |                    |                     |                    |                  |                     |                    |                     |                    |                  |                     |                    |                     |                    |                  |                     |
| PHENAKI-GEN-MT                    | 105.2±0.26         | 182.0±0.17          | 63.0±0.04          | 4.2±0.02         | 19.8±0.02           | 92.8±0.58          | 141.9±0.22          | 63.1±0.03          | 5.2±0.03         | 18.9±0.02           | 90.7±0.24          | 126.4±0.82          | 63.4±0.02          | 4.3±0.04         | 19.7±0.04           |
| PHENAKI-CONT-MT                   | 92.1±0.44          | 171.4±0.67          | 65.7±0.09          | 5.1±0.02         | 19.8±0.02           | <b>80.4</b> ±0.17  | 129.0±0.65          | <b>66.3</b> ±0.09  | 7.0±0.02         | 19.6±0.05           | 95.5±0.33          | 120.2±0.23          | 63.4±0.07          | 5.5±0.09         | 19.0±0.01           |

Table 9: Results from automatic evaluation metrics on *story continuation* tasks. Best results are in **bold**. FID and SIM use CLIP, FVD and VTM use InternVideo, and PQA uses DOVER.

| Story Generation Model (@8 fps) | Oops-CSV           |                     |                    |                  |                     | UVO-CSV            |                     |                    |                   |                     | DiDeMo-CSV         |                     |                    |                  |                     |
|---------------------------------|--------------------|---------------------|--------------------|------------------|---------------------|--------------------|---------------------|--------------------|-------------------|---------------------|--------------------|---------------------|--------------------|------------------|---------------------|
|                                 | FID <sub>C</sub> ↓ | FVD <sub>IV</sub> ↓ | SIM <sub>C</sub> ↑ | PQA↑             | VTM <sub>IV</sub> ↑ | FID <sub>C</sub> ↓ | FVD <sub>IV</sub> ↓ | SIM <sub>C</sub> ↑ | PQA↑              | VTM <sub>IV</sub> ↑ | FID <sub>C</sub> ↓ | FVD <sub>IV</sub> ↓ | SIM <sub>C</sub> ↑ | PQA↑             | VTM <sub>IV</sub> ↑ |
| PHENAKI-GEN-ZS                  | 117.2±0.90         | <b>113.0</b> ±0.54  | N/A                | <b>8.1</b> ±0.03 | <b>22.9</b> ±0.11   | 97.5±0.89          | <b>88.2</b> ±0.68   | N/A                | <b>10.0</b> ±0.06 | <b>22.6</b> ±0.14   | 115.6±0.38         | <b>91.1</b> ±0.46   | N/A                | <b>7.6</b> ±0.08 | <b>23.0</b> ±0.06   |
| <i>Zero-shot</i>                |                    |                     |                    |                  |                     |                    |                     |                    |                   |                     |                    |                     |                    |                  |                     |
| <i>Single-Task</i>              |                    |                     |                    |                  |                     |                    |                     |                    |                   |                     |                    |                     |                    |                  |                     |
| PHENAKI-GEN-ST                  | <b>103.4</b> ±0.28 | 181.4±0.19          | N/A                | 4.2±0.02         | 19.6±0.03           | 99.2±0.22          | 151.7±0.45          | N/A                | 4.9±0.01          | 18.0±0.01           | 92.3±0.07          | 128.6±0.44          | N/A                | 4.0±0.01         | 20.1±0.04           |
| PHENAKI-CONT-ST                 | <b>109.1</b> ±0.89 | 167.9±0.95          | N/A                | 5.4±0.03         | 17.9±0.03           | <b>100.6</b> ±0.47 | 149.6±0.24          | N/A                | 5.4±0.02          | 17.4±0.02           | <b>96.1</b> ±0.11  | 124.6±0.86          | N/A                | 5.4±0.05         | 18.9±0.02           |
| <i>Multi-Task</i>               |                    |                     |                    |                  |                     |                    |                     |                    |                   |                     |                    |                     |                    |                  |                     |
| PHENAKI-GEN-MT                  | 107.4±0.71         | 180.0±0.52          | N/A                | 4.1±0.02         | 19.8±0.06           | <b>94.8</b> ±0.25  | 143.0±0.28          | N/A                | 5.1±0.03          | 18.8±0.01           | <b>92.0</b> ±0.20  | 127.3±0.46          | N/A                | 4.3±0.06         | 19.8±0.01           |
| PHENAKI-CONT-MT                 | 114.3±0.12         | 171.0±0.53          | N/A                | 5.0±0.11         | 18.0±0.06           | <b>99.8</b> ±0.28  | 132.7±0.52          | N/A                | 6.3±0.08          | 17.5±0.05           | 105.6±0.26         | 125.9±1.03          | N/A                | 5.2±0.03         | 18.3±0.06           |

Table 10: Results from automatic evaluation metrics on *story generation* tasks. Best results are in **bold**. FID uses CLIP, FVD and VTM use InternVideo, and PQA uses DOVER.
